# Supplementary material
Source: PubMed Central journal article supplement (PMC4571704)

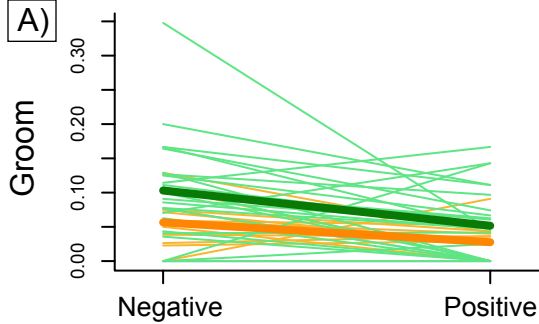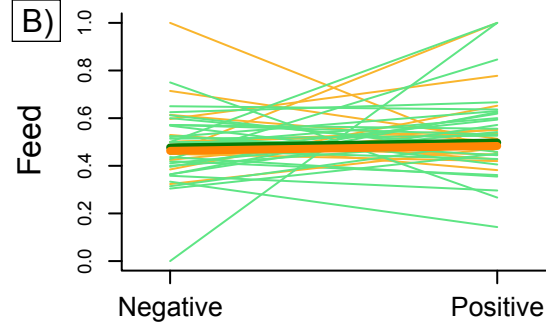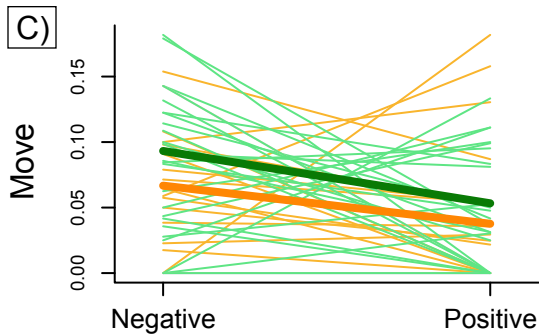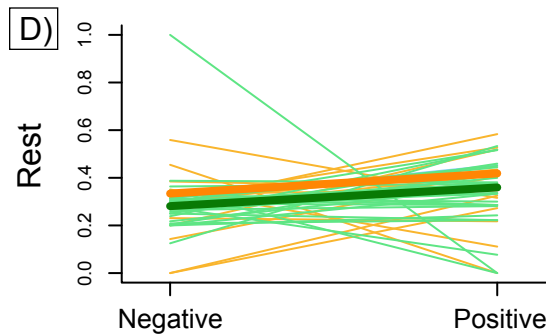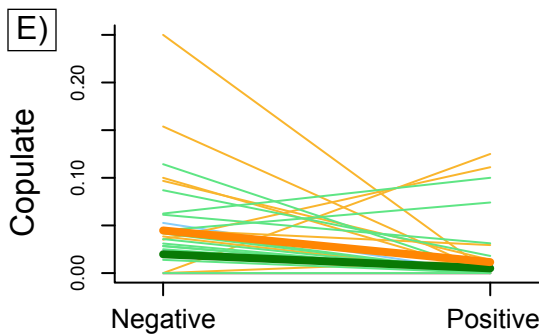

Supplement: rspb20151436supp2.pdf [file rspb20151436supp2.pdf]

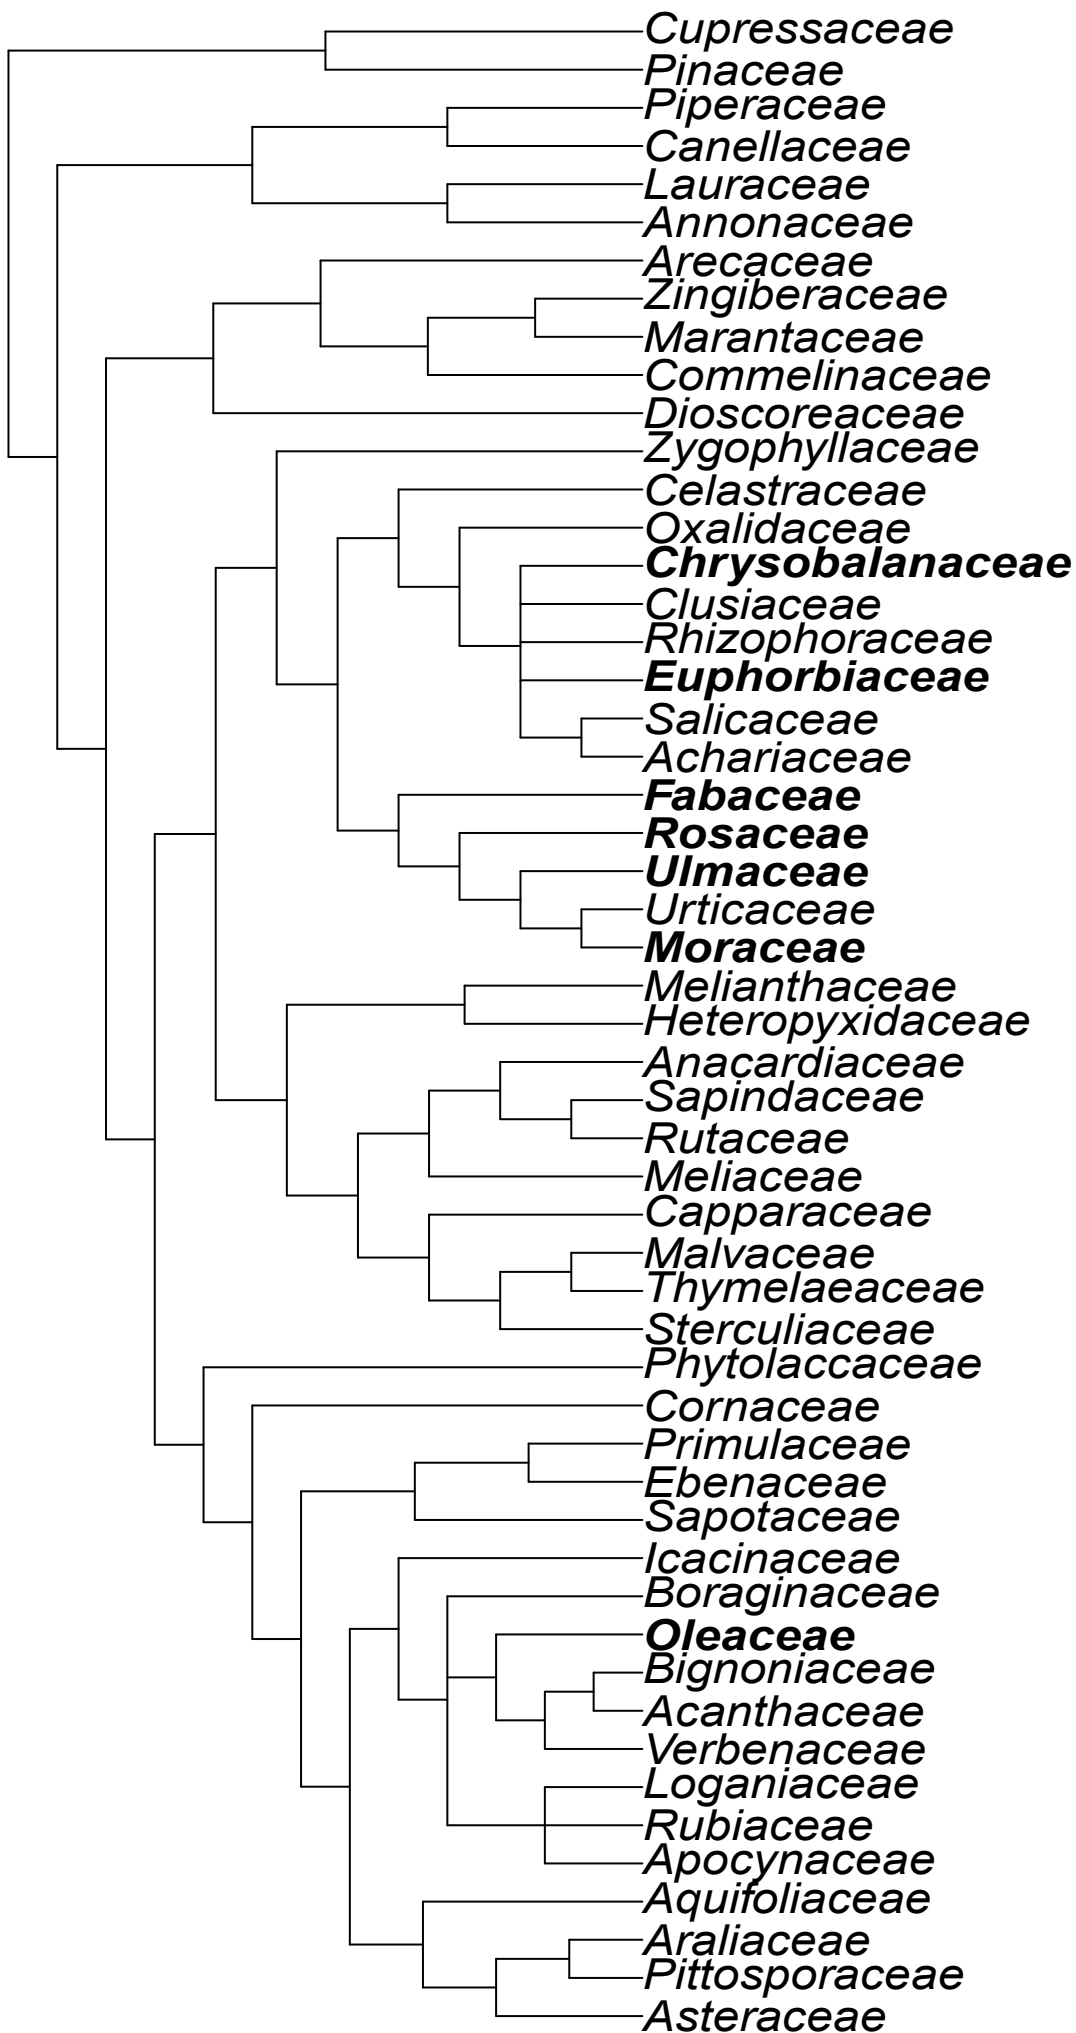

Supplement: rspb20151436supp3.pdf [file rspb20151436supp3.pdf]

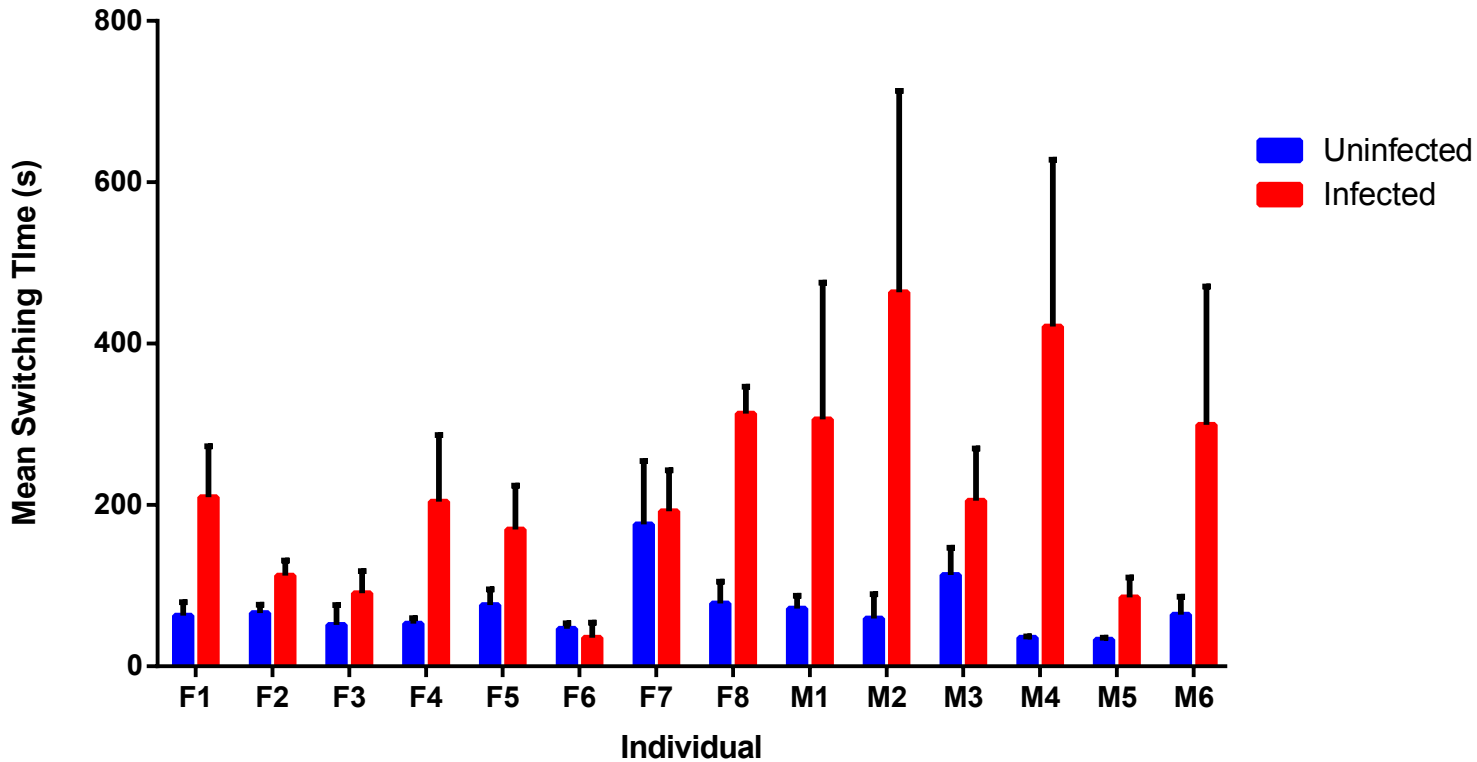

Supplement: rspb20151436supp4.pdf [file rspb20151436supp4.pdf]
